# Supplementary material for: Soft carbon electrodes in capacitive energy extraction: exploring geometry and operational parameters in capacitive mixing systems
Source: Royal Society of Chemistry journal article supplement (doi:10.1039/d4ya00605d), 2025-01-01
Supplement: d4ya00605d1.pdf [file d4ya00605d1.pdf]

**Soft carbon electrodes in capacitive energy extraction: exploring geometry  
and operational parameters in capacitive mixing systems**

**SUPPLEMENTARY INFORMATION**

*Ana Collazo-Castiñeira<sup>1</sup>, Sergio Orozco-Barrera<sup>1</sup>, Guillermo R. Iglesias<sup>1,2,3</sup>, Ángel V.*

*Delgado<sup>1,2,3</sup>, Silvia Ahualli<sup>1\*</sup>*

<sup>1</sup> Department of Applied Physics, University of Granada, 18071, Granada, Spain.

<sup>2</sup> NanoMag Laboratory, University of Granada

<sup>3</sup> Instituto de Investigación Biosanitaria ibs.GRANADA, Spain.

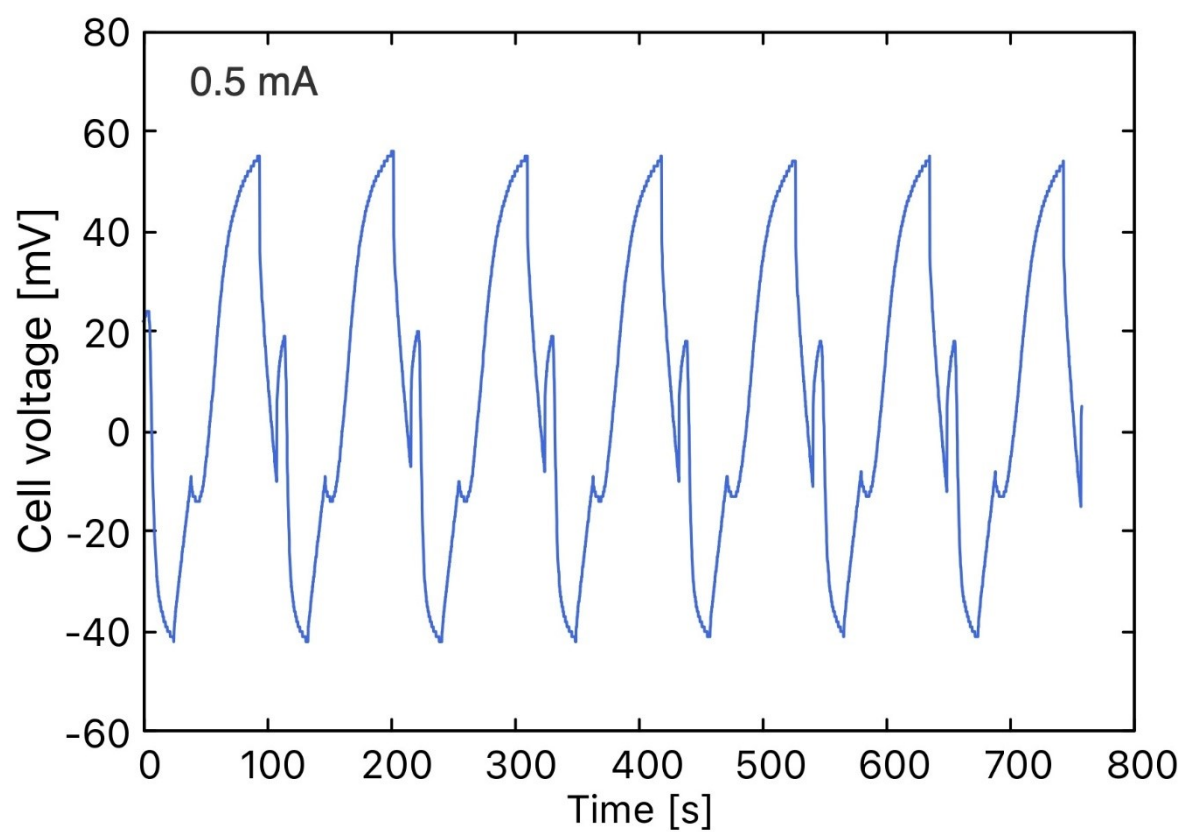

**Figure S1.** Electric potential difference between electrodes as a function of time in successive cycles for 0.5 mA applied current.
